# Supplementary material
Source: PubMed Central journal article supplement (PMC4673044)

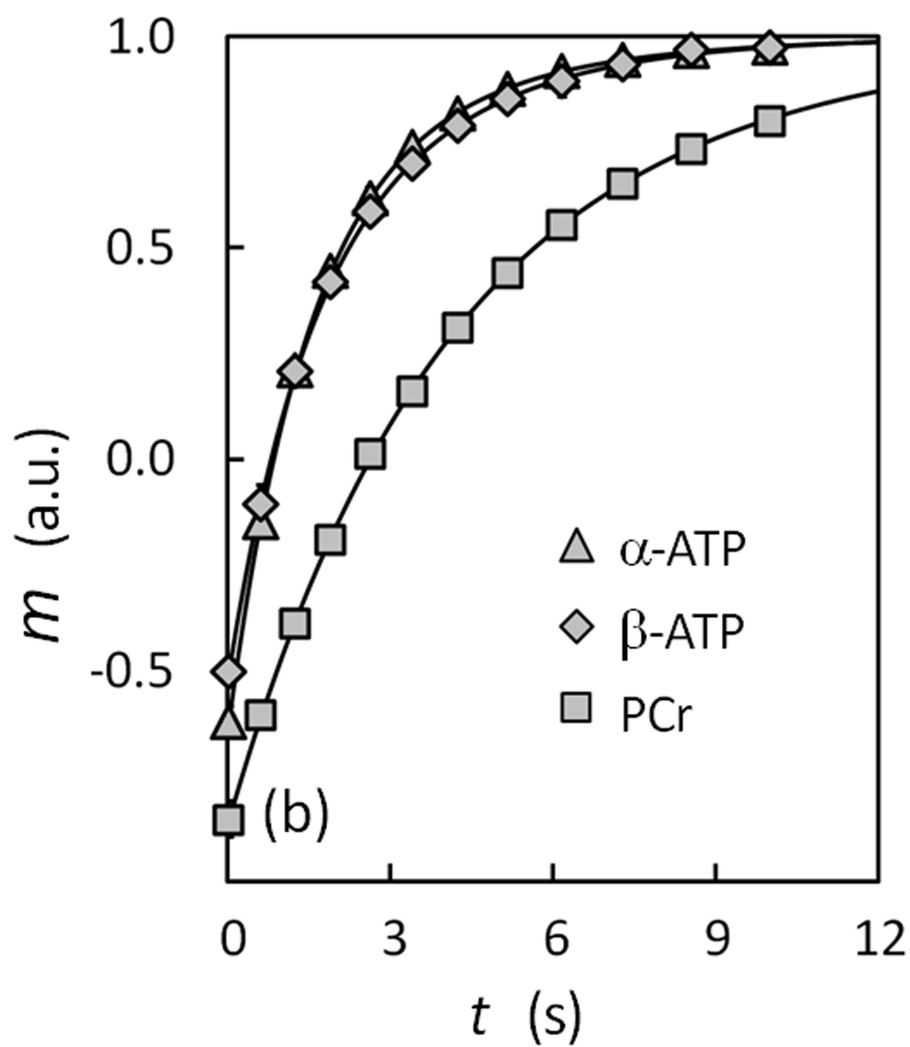

Probability Distribution  
(a.u.)

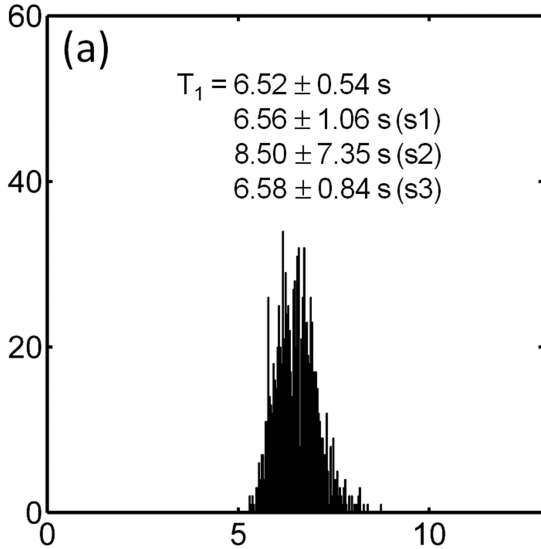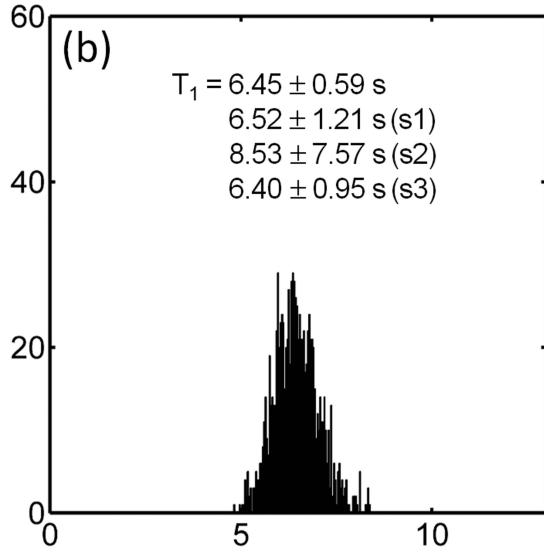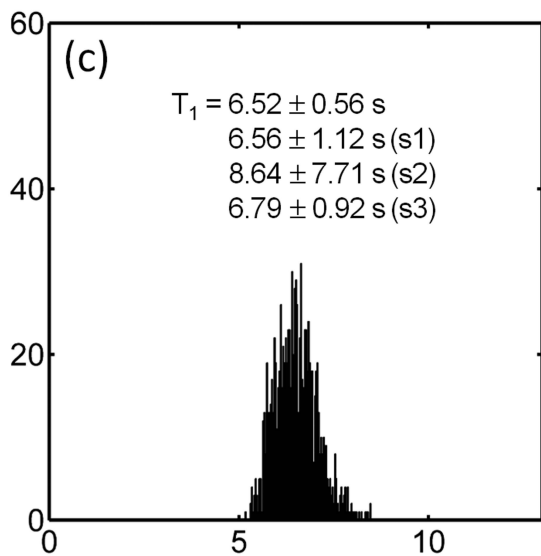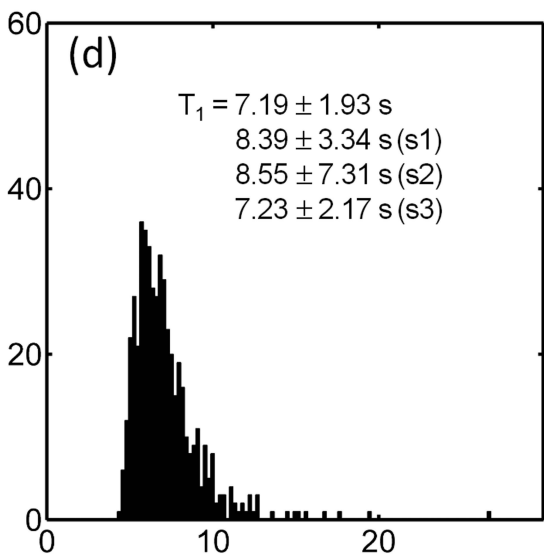

$T_1$  (s)

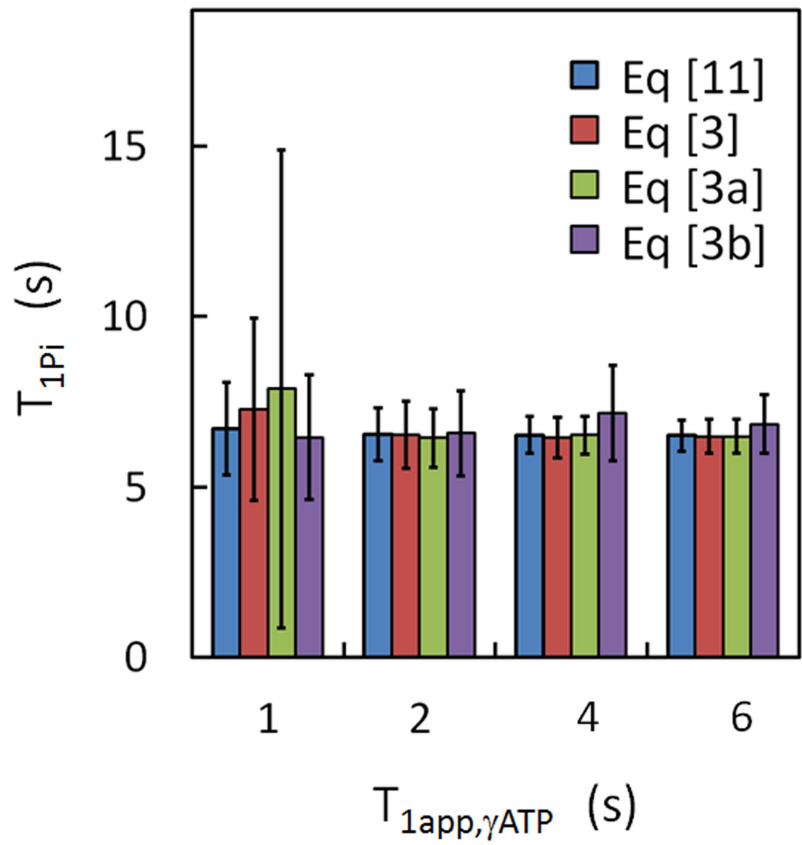

Supplement: NIHMS686244-supplement-Supp_FigureS1-S3.pdf [file NIHMS686244-supplement-Supp_FigureS1-S3.pdf]
